# Supplementary material
Source: HighWire-hosted journal article supplement (https://jnis.bmj.com/content/14/12/1264)
Supplement: inline-supplementary-material-1 [file inline-supplementary-material-1.pdf]

### ICMJE DISCLOSURE FORM

**Date:** Click or tap to enter a date. 11/25/2021

**Your Name:** Click or tap here to enter text. Eytan Raz

**Manuscript Title:** Click or tap here to enter text. Vessel-Wall Imaging with Advanced Flow Suppression in the Characterization of Intracranial Aneurysms Following Flow Diversion with Pipeline Embolization Device

**Manuscript Number (if known):** Click or tap here to enter text. 2021-018086

In the interest of transparency, we ask you to disclose all relationships/activities/interests listed below that are related to the content of your manuscript. "Related" means any relation with for-profit or not-for-profit third parties whose interests may be affected by the content of the manuscript. Disclosure represents a commitment to transparency and does not necessarily indicate a bias. If you are in doubt about whether to list a relationship/activity/interest, it is preferable that you do so.

The author's relationships/activities/interests should be defined broadly. For example, if your manuscript pertains to the epidemiology of hypertension, you should declare all relationships with manufacturers of antihypertensive medication, even if that medication is not mentioned in the manuscript.

In item #1 below, report all support for the work reported in this manuscript without time limit. For all other items, the time frame for disclosure is the past 36 months.

|                                                           |                                                                                                                                                                                | Name all entities with whom you have this relationship or indicate none (add rows as needed)                                                                                                                                                                                                                                                                                                     | Specifications/Comments (e.g., if payments were made to you or to your institution) |  |  |  |  |  |                                                                                                                                                                                                                                                                                                         |  |  |  |
|-----------------------------------------------------------|--------------------------------------------------------------------------------------------------------------------------------------------------------------------------------|--------------------------------------------------------------------------------------------------------------------------------------------------------------------------------------------------------------------------------------------------------------------------------------------------------------------------------------------------------------------------------------------------|-------------------------------------------------------------------------------------|--|--|--|--|--|---------------------------------------------------------------------------------------------------------------------------------------------------------------------------------------------------------------------------------------------------------------------------------------------------------|--|--|--|
| <b>Time frame: Since the initial planning of the work</b> |                                                                                                                                                                                |                                                                                                                                                                                                                                                                                                                                                                                                  |                                                                                     |  |  |  |  |  |                                                                                                                                                                                                                                                                                                         |  |  |  |
| <b>1</b>                                                  | All support for the present manuscript (e.g., funding, provision of study materials, medical writing, article processing charges, etc.)<br><b>No time limit for this item.</b> | <input checked="" type="checkbox"/> <b>None</b><br><table border="1" style="width: 100%; border-collapse: collapse;"> <tr><td style="height: 20px;"> </td><td style="width: 20%; height: 20px;"> </td></tr> <tr><td style="height: 20px;"> </td><td style="width: 20%; height: 20px;"> </td></tr> <tr><td style="height: 20px;"> </td><td style="width: 20%; height: 20px;"> </td></tr> </table> |                                                                                     |  |  |  |  |  | <table border="1" style="width: 100%; border-collapse: collapse;"> <tr><td style="height: 20px;"> </td></tr> <tr><td style="height: 20px;"> </td></tr> <tr><td style="height: 20px;"> </td></tr> </table> <p style="font-size: small; text-align: right;">Click the tab key to add additional rows.</p> |  |  |  |
|                                                           |                                                                                                                                                                                |                                                                                                                                                                                                                                                                                                                                                                                                  |                                                                                     |  |  |  |  |  |                                                                                                                                                                                                                                                                                                         |  |  |  |
|                                                           |                                                                                                                                                                                |                                                                                                                                                                                                                                                                                                                                                                                                  |                                                                                     |  |  |  |  |  |                                                                                                                                                                                                                                                                                                         |  |  |  |
|                                                           |                                                                                                                                                                                |                                                                                                                                                                                                                                                                                                                                                                                                  |                                                                                     |  |  |  |  |  |                                                                                                                                                                                                                                                                                                         |  |  |  |
|                                                           |                                                                                                                                                                                |                                                                                                                                                                                                                                                                                                                                                                                                  |                                                                                     |  |  |  |  |  |                                                                                                                                                                                                                                                                                                         |  |  |  |
|                                                           |                                                                                                                                                                                |                                                                                                                                                                                                                                                                                                                                                                                                  |                                                                                     |  |  |  |  |  |                                                                                                                                                                                                                                                                                                         |  |  |  |
|                                                           |                                                                                                                                                                                |                                                                                                                                                                                                                                                                                                                                                                                                  |                                                                                     |  |  |  |  |  |                                                                                                                                                                                                                                                                                                         |  |  |  |
| <b>Time frame: past 36 months</b>                         |                                                                                                                                                                                |                                                                                                                                                                                                                                                                                                                                                                                                  |                                                                                     |  |  |  |  |  |                                                                                                                                                                                                                                                                                                         |  |  |  |
| <b>2</b>                                                  | Grants or contracts from any entity (if not indicated in item #1 above).                                                                                                       | <input checked="" type="checkbox"/> <b>None</b><br><table border="1" style="width: 100%; border-collapse: collapse;"> <tr><td style="height: 20px;"> </td><td style="width: 20%; height: 20px;"> </td></tr> <tr><td style="height: 20px;"> </td><td style="width: 20%; height: 20px;"> </td></tr> <tr><td style="height: 20px;"> </td><td style="width: 20%; height: 20px;"> </td></tr> </table> |                                                                                     |  |  |  |  |  | <table border="1" style="width: 100%; border-collapse: collapse;"> <tr><td style="height: 20px;"> </td></tr> <tr><td style="height: 20px;"> </td></tr> <tr><td style="height: 20px;"> </td></tr> </table>                                                                                               |  |  |  |
|                                                           |                                                                                                                                                                                |                                                                                                                                                                                                                                                                                                                                                                                                  |                                                                                     |  |  |  |  |  |                                                                                                                                                                                                                                                                                                         |  |  |  |
|                                                           |                                                                                                                                                                                |                                                                                                                                                                                                                                                                                                                                                                                                  |                                                                                     |  |  |  |  |  |                                                                                                                                                                                                                                                                                                         |  |  |  |
|                                                           |                                                                                                                                                                                |                                                                                                                                                                                                                                                                                                                                                                                                  |                                                                                     |  |  |  |  |  |                                                                                                                                                                                                                                                                                                         |  |  |  |
|                                                           |                                                                                                                                                                                |                                                                                                                                                                                                                                                                                                                                                                                                  |                                                                                     |  |  |  |  |  |                                                                                                                                                                                                                                                                                                         |  |  |  |
|                                                           |                                                                                                                                                                                |                                                                                                                                                                                                                                                                                                                                                                                                  |                                                                                     |  |  |  |  |  |                                                                                                                                                                                                                                                                                                         |  |  |  |
|                                                           |                                                                                                                                                                                |                                                                                                                                                                                                                                                                                                                                                                                                  |                                                                                     |  |  |  |  |  |                                                                                                                                                                                                                                                                                                         |  |  |  |
| <b>3</b>                                                  | Royalties or licenses                                                                                                                                                          | <input checked="" type="checkbox"/> <b>None</b><br><table border="1" style="width: 100%; border-collapse: collapse;"> <tr><td style="height: 20px;"> </td><td style="width: 20%; height: 20px;"> </td></tr> <tr><td style="height: 20px;"> </td><td style="width: 20%; height: 20px;"> </td></tr> <tr><td style="height: 20px;"> </td><td style="width: 20%; height: 20px;"> </td></tr> </table> |                                                                                     |  |  |  |  |  | <table border="1" style="width: 100%; border-collapse: collapse;"> <tr><td style="height: 20px;"> </td></tr> <tr><td style="height: 20px;"> </td></tr> <tr><td style="height: 20px;"> </td></tr> </table>                                                                                               |  |  |  |
|                                                           |                                                                                                                                                                                |                                                                                                                                                                                                                                                                                                                                                                                                  |                                                                                     |  |  |  |  |  |                                                                                                                                                                                                                                                                                                         |  |  |  |
|                                                           |                                                                                                                                                                                |                                                                                                                                                                                                                                                                                                                                                                                                  |                                                                                     |  |  |  |  |  |                                                                                                                                                                                                                                                                                                         |  |  |  |
|                                                           |                                                                                                                                                                                |                                                                                                                                                                                                                                                                                                                                                                                                  |                                                                                     |  |  |  |  |  |                                                                                                                                                                                                                                                                                                         |  |  |  |
|                                                           |                                                                                                                                                                                |                                                                                                                                                                                                                                                                                                                                                                                                  |                                                                                     |  |  |  |  |  |                                                                                                                                                                                                                                                                                                         |  |  |  |
|                                                           |                                                                                                                                                                                |                                                                                                                                                                                                                                                                                                                                                                                                  |                                                                                     |  |  |  |  |  |                                                                                                                                                                                                                                                                                                         |  |  |  |
|                                                           |                                                                                                                                                                                |                                                                                                                                                                                                                                                                                                                                                                                                  |                                                                                     |  |  |  |  |  |                                                                                                                                                                                                                                                                                                         |  |  |  |

|                                          |                                                                                                              | Name all entities with whom you have this relationship or indicate none (add rows as needed)                                                                                                                                                                                                  | Specifications/Comments (e.g., if payments were made to you or to your institution) |  |  |  |  |  |  |
|------------------------------------------|--------------------------------------------------------------------------------------------------------------|-----------------------------------------------------------------------------------------------------------------------------------------------------------------------------------------------------------------------------------------------------------------------------------------------|-------------------------------------------------------------------------------------|--|--|--|--|--|--|
| 4                                        | Consulting fees                                                                                              | <input type="checkbox"/> None<br><table border="1" style="width: 100%; border-collapse: collapse;"> <tr> <td style="width: 50%;">Microvention, Imperative Care, medtronic</td> <td style="width: 50%;"></td> </tr> <tr> <td> </td> <td> </td> </tr> <tr> <td> </td> <td> </td> </tr> </table> | Microvention, Imperative Care, medtronic                                            |  |  |  |  |  |  |
| Microvention, Imperative Care, medtronic |                                                                                                              |                                                                                                                                                                                                                                                                                               |                                                                                     |  |  |  |  |  |  |
|                                          |                                                                                                              |                                                                                                                                                                                                                                                                                               |                                                                                     |  |  |  |  |  |  |
|                                          |                                                                                                              |                                                                                                                                                                                                                                                                                               |                                                                                     |  |  |  |  |  |  |
| 5                                        | Payment or honoraria for lectures, presentations, speakers bureaus, manuscript writing or educational events | <input checked="" type="checkbox"/> None<br><table border="1" style="width: 100%; border-collapse: collapse;"> <tr> <td style="width: 50%;"></td> <td style="width: 50%;"></td> </tr> <tr> <td> </td> <td> </td> </tr> <tr> <td> </td> <td> </td> </tr> </table>                              |                                                                                     |  |  |  |  |  |  |
|                                          |                                                                                                              |                                                                                                                                                                                                                                                                                               |                                                                                     |  |  |  |  |  |  |
|                                          |                                                                                                              |                                                                                                                                                                                                                                                                                               |                                                                                     |  |  |  |  |  |  |
|                                          |                                                                                                              |                                                                                                                                                                                                                                                                                               |                                                                                     |  |  |  |  |  |  |
| 6                                        | Payment for expert testimony                                                                                 | <input type="checkbox"/> None<br><table border="1" style="width: 100%; border-collapse: collapse;"> <tr> <td style="width: 50%;">Various law firms</td> <td style="width: 50%;"></td> </tr> <tr> <td> </td> <td> </td> </tr> <tr> <td> </td> <td> </td> </tr> </table>                        | Various law firms                                                                   |  |  |  |  |  |  |
| Various law firms                        |                                                                                                              |                                                                                                                                                                                                                                                                                               |                                                                                     |  |  |  |  |  |  |
|                                          |                                                                                                              |                                                                                                                                                                                                                                                                                               |                                                                                     |  |  |  |  |  |  |
|                                          |                                                                                                              |                                                                                                                                                                                                                                                                                               |                                                                                     |  |  |  |  |  |  |
| 7                                        | Support for attending meetings and/or travel                                                                 | <input checked="" type="checkbox"/> None<br><table border="1" style="width: 100%; border-collapse: collapse;"> <tr> <td style="width: 50%;"></td> <td style="width: 50%;"></td> </tr> <tr> <td> </td> <td> </td> </tr> <tr> <td> </td> <td> </td> </tr> </table>                              |                                                                                     |  |  |  |  |  |  |
|                                          |                                                                                                              |                                                                                                                                                                                                                                                                                               |                                                                                     |  |  |  |  |  |  |
|                                          |                                                                                                              |                                                                                                                                                                                                                                                                                               |                                                                                     |  |  |  |  |  |  |
|                                          |                                                                                                              |                                                                                                                                                                                                                                                                                               |                                                                                     |  |  |  |  |  |  |
| 8                                        | Patents planned, issued or pending                                                                           | <input checked="" type="checkbox"/> None<br><table border="1" style="width: 100%; border-collapse: collapse;"> <tr> <td style="width: 50%;"></td> <td style="width: 50%;"></td> </tr> <tr> <td> </td> <td> </td> </tr> <tr> <td> </td> <td> </td> </tr> </table>                              |                                                                                     |  |  |  |  |  |  |
|                                          |                                                                                                              |                                                                                                                                                                                                                                                                                               |                                                                                     |  |  |  |  |  |  |
|                                          |                                                                                                              |                                                                                                                                                                                                                                                                                               |                                                                                     |  |  |  |  |  |  |
|                                          |                                                                                                              |                                                                                                                                                                                                                                                                                               |                                                                                     |  |  |  |  |  |  |
| 9                                        | Participation on a Data Safety Monitoring Board or Advisory Board                                            | <input checked="" type="checkbox"/> None<br><table border="1" style="width: 100%; border-collapse: collapse;"> <tr> <td style="width: 50%;"></td> <td style="width: 50%;"></td> </tr> <tr> <td> </td> <td> </td> </tr> <tr> <td> </td> <td> </td> </tr> </table>                              |                                                                                     |  |  |  |  |  |  |
|                                          |                                                                                                              |                                                                                                                                                                                                                                                                                               |                                                                                     |  |  |  |  |  |  |
|                                          |                                                                                                              |                                                                                                                                                                                                                                                                                               |                                                                                     |  |  |  |  |  |  |
|                                          |                                                                                                              |                                                                                                                                                                                                                                                                                               |                                                                                     |  |  |  |  |  |  |
| 10                                       | Leadership or fiduciary role in other board, society, committee or advocacy group, paid or unpaid            | <input checked="" type="checkbox"/> None<br><table border="1" style="width: 100%; border-collapse: collapse;"> <tr> <td style="width: 50%;"></td> <td style="width: 50%;"></td> </tr> <tr> <td> </td> <td> </td> </tr> <tr> <td> </td> <td> </td> </tr> </table>                              |                                                                                     |  |  |  |  |  |  |
|                                          |                                                                                                              |                                                                                                                                                                                                                                                                                               |                                                                                     |  |  |  |  |  |  |
|                                          |                                                                                                              |                                                                                                                                                                                                                                                                                               |                                                                                     |  |  |  |  |  |  |
|                                          |                                                                                                              |                                                                                                                                                                                                                                                                                               |                                                                                     |  |  |  |  |  |  |

|                                                                                                                                                                                                                                                               |                                                                                  | Name all entities with whom you have this relationship or indicate none (add rows as needed)                                                                                           | Specifications/Comments (e.g., if payments were made to you or to your institution) |  |  |  |  |  |  |
|---------------------------------------------------------------------------------------------------------------------------------------------------------------------------------------------------------------------------------------------------------------|----------------------------------------------------------------------------------|----------------------------------------------------------------------------------------------------------------------------------------------------------------------------------------|-------------------------------------------------------------------------------------|--|--|--|--|--|--|
| <b>11</b>                                                                                                                                                                                                                                                     | Stock or stock options                                                           | <input type="checkbox"/> <b>None</b><br><table border="1"> <tr><td>Siemens</td><td></td></tr> <tr><td></td><td></td></tr> <tr><td></td><td></td></tr> </table>                         | Siemens                                                                             |  |  |  |  |  |  |
| Siemens                                                                                                                                                                                                                                                       |                                                                                  |                                                                                                                                                                                        |                                                                                     |  |  |  |  |  |  |
|                                                                                                                                                                                                                                                               |                                                                                  |                                                                                                                                                                                        |                                                                                     |  |  |  |  |  |  |
|                                                                                                                                                                                                                                                               |                                                                                  |                                                                                                                                                                                        |                                                                                     |  |  |  |  |  |  |
| <b>12</b>                                                                                                                                                                                                                                                     | Receipt of equipment, materials, drugs, medical writing, gifts or other services | <input checked="" type="checkbox"/> <b>None</b><br><table border="1"> <tr><td></td><td></td></tr> <tr><td></td><td></td></tr> <tr><td></td><td></td></tr> </table>                     |                                                                                     |  |  |  |  |  |  |
|                                                                                                                                                                                                                                                               |                                                                                  |                                                                                                                                                                                        |                                                                                     |  |  |  |  |  |  |
|                                                                                                                                                                                                                                                               |                                                                                  |                                                                                                                                                                                        |                                                                                     |  |  |  |  |  |  |
|                                                                                                                                                                                                                                                               |                                                                                  |                                                                                                                                                                                        |                                                                                     |  |  |  |  |  |  |
| <b>13</b>                                                                                                                                                                                                                                                     | Other financial or non-financial interests                                       | <input type="checkbox"/> <b>None</b><br><table border="1"> <tr><td>Prost and Advance trial site PI</td><td></td></tr> <tr><td></td><td></td></tr> <tr><td></td><td></td></tr> </table> | Prost and Advance trial site PI                                                     |  |  |  |  |  |  |
| Prost and Advance trial site PI                                                                                                                                                                                                                               |                                                                                  |                                                                                                                                                                                        |                                                                                     |  |  |  |  |  |  |
|                                                                                                                                                                                                                                                               |                                                                                  |                                                                                                                                                                                        |                                                                                     |  |  |  |  |  |  |
|                                                                                                                                                                                                                                                               |                                                                                  |                                                                                                                                                                                        |                                                                                     |  |  |  |  |  |  |
| <p><b>Please place an "X" next to the following statement to indicate your agreement:</b></p> <p><input checked="" type="checkbox"/> I certify that I have answered every question and have not altered the wording of any of the questions on this form.</p> |                                                                                  |                                                                                                                                                                                        |                                                                                     |  |  |  |  |  |  |

## ICMJE DISCLOSURE FORM

**Date:** 11/30/2021

**Your Name:** Adam Goldman-Yassen

**Manuscript Title:** Vessel-Wall Imaging with Advanced Flow Suppression in the Characterization of Intracranial Aneurysms Following Flow Diversion with Pipeline Embolization Device

**Manuscript Number (if known):** neurintsurg-2021-018086.R1

In the interest of transparency, we ask you to disclose all relationships/activities/interests listed below that are related to the content of your manuscript. "Related" means any relation with for-profit or not-for-profit third parties whose interests may be affected by the content of the manuscript. Disclosure represents a commitment to transparency and does not necessarily indicate a bias. If you are in doubt about whether to list a relationship/activity/interest, it is preferable that you do so.

The author's relationships/activities/interests should be defined broadly. For example, if your manuscript pertains to the epidemiology of hypertension, you should declare all relationships with manufacturers of antihypertensive medication, even if that medication is not mentioned in the manuscript.

In item #1 below, report all support for the work reported in this manuscript without time limit. For all other items, the time frame for disclosure is the past 36 months.

|                                                           | Name all entities with whom you have this relationship or indicate none (add rows as needed)                                                                                   | Specifications/Comments (e.g., if payments were made to you or to your institution)                                                                                                                                                                                                                                                                                       |  |  |  |  |  |  |
|-----------------------------------------------------------|--------------------------------------------------------------------------------------------------------------------------------------------------------------------------------|---------------------------------------------------------------------------------------------------------------------------------------------------------------------------------------------------------------------------------------------------------------------------------------------------------------------------------------------------------------------------|--|--|--|--|--|--|
| <b>Time frame: Since the initial planning of the work</b> |                                                                                                                                                                                |                                                                                                                                                                                                                                                                                                                                                                           |  |  |  |  |  |  |
| <b>1</b>                                                  | All support for the present manuscript (e.g., funding, provision of study materials, medical writing, article processing charges, etc.)<br><b>No time limit for this item.</b> | <input checked="" type="checkbox"/> <b>None</b><br><table border="1" style="width: 100%; height: 40px; margin-top: 5px;"> <tr><td style="width: 60%;"></td><td style="width: 40%;"></td></tr> <tr><td></td><td></td></tr> <tr><td></td><td></td></tr> </table> <p style="font-size: small; color: gray; text-align: right;">Click the tab key to add additional rows.</p> |  |  |  |  |  |  |
|                                                           |                                                                                                                                                                                |                                                                                                                                                                                                                                                                                                                                                                           |  |  |  |  |  |  |
|                                                           |                                                                                                                                                                                |                                                                                                                                                                                                                                                                                                                                                                           |  |  |  |  |  |  |
|                                                           |                                                                                                                                                                                |                                                                                                                                                                                                                                                                                                                                                                           |  |  |  |  |  |  |
| <b>Time frame: past 36 months</b>                         |                                                                                                                                                                                |                                                                                                                                                                                                                                                                                                                                                                           |  |  |  |  |  |  |
| <b>2</b>                                                  | Grants or contracts from any entity (if not indicated in item #1 above).                                                                                                       | <input checked="" type="checkbox"/> <b>None</b><br><table border="1" style="width: 100%; height: 40px; margin-top: 5px;"> <tr><td style="width: 60%;"></td><td style="width: 40%;"></td></tr> <tr><td></td><td></td></tr> <tr><td></td><td></td></tr> </table>                                                                                                            |  |  |  |  |  |  |
|                                                           |                                                                                                                                                                                |                                                                                                                                                                                                                                                                                                                                                                           |  |  |  |  |  |  |
|                                                           |                                                                                                                                                                                |                                                                                                                                                                                                                                                                                                                                                                           |  |  |  |  |  |  |
|                                                           |                                                                                                                                                                                |                                                                                                                                                                                                                                                                                                                                                                           |  |  |  |  |  |  |

|           |                                                                                                              | <b>Name all entities with whom you have this relationship or indicate none (add rows as needed)</b> | <b>Specifications/Comments (e.g., if payments were made to you or to your institution)</b> |
|-----------|--------------------------------------------------------------------------------------------------------------|-----------------------------------------------------------------------------------------------------|--------------------------------------------------------------------------------------------|
| <b>3</b>  | Royalties or licenses                                                                                        | <input checked="" type="checkbox"/> <b>None</b><br><br><br>                                         |                                                                                            |
| <b>4</b>  | Consulting fees                                                                                              | <input checked="" type="checkbox"/> <b>None</b><br><br><br>                                         |                                                                                            |
| <b>5</b>  | Payment or honoraria for lectures, presentations, speakers bureaus, manuscript writing or educational events | <input checked="" type="checkbox"/> <b>None</b><br><br><br>                                         |                                                                                            |
| <b>6</b>  | Payment for expert testimony                                                                                 | <input checked="" type="checkbox"/> <b>None</b><br><br><br>                                         |                                                                                            |
| <b>7</b>  | Support for attending meetings and/or travel                                                                 | <input checked="" type="checkbox"/> <b>None</b><br><br><br>                                         |                                                                                            |
| <b>8</b>  | Patents planned, issued or pending                                                                           | <input checked="" type="checkbox"/> <b>None</b><br><br><br>                                         |                                                                                            |
| <b>9</b>  | Participation on a Data Safety Monitoring Board or Advisory Board                                            | <input checked="" type="checkbox"/> <b>None</b><br><br><br>                                         |                                                                                            |
| <b>10</b> | Leadership or fiduciary role in other board, society,                                                        | <input checked="" type="checkbox"/> <b>None</b><br><br><br>                                         |                                                                                            |

|                                                                                                                                                                                                                                                               |                                                                                  | <b>Name all entities with whom you have this relationship or indicate none (add rows as needed)</b> | <b>Specifications/Comments (e.g., if payments were made to you or to your institution)</b> |
|---------------------------------------------------------------------------------------------------------------------------------------------------------------------------------------------------------------------------------------------------------------|----------------------------------------------------------------------------------|-----------------------------------------------------------------------------------------------------|--------------------------------------------------------------------------------------------|
|                                                                                                                                                                                                                                                               | committee or advocacy group, paid or unpaid                                      |                                                                                                     |                                                                                            |
| <b>1</b>                                                                                                                                                                                                                                                      | Stock or stock options                                                           | <input checked="" type="checkbox"/> <b>None</b>                                                     |                                                                                            |
| <b>1</b>                                                                                                                                                                                                                                                      |                                                                                  |                                                                                                     |                                                                                            |
| <b>1</b>                                                                                                                                                                                                                                                      | Receipt of equipment, materials, drugs, medical writing, gifts or other services | <input checked="" type="checkbox"/> <b>None</b>                                                     |                                                                                            |
| <b>2</b>                                                                                                                                                                                                                                                      |                                                                                  |                                                                                                     |                                                                                            |
| <b>1</b>                                                                                                                                                                                                                                                      | Other financial or non-financial interests                                       | <input checked="" type="checkbox"/> <b>None</b>                                                     |                                                                                            |
| <b>3</b>                                                                                                                                                                                                                                                      |                                                                                  |                                                                                                     |                                                                                            |
| <p><b>Please place an "X" next to the following statement to indicate your agreement:</b></p> <p><input checked="" type="checkbox"/> I certify that I have answered every question and have not altered the wording of any of the questions on this form.</p> |                                                                                  |                                                                                                     |                                                                                            |

## ICMJE DISCLOSURE FORM

**Date:** 12/01/2021

**Your Name:** Anna Y. Derman, MD

**Manuscript Title:** Vessel-Wall Imaging with Advanced Flow Suppression in the Characterization of Intracranial Aneurysms Following Flow Diversion with Pipeline Embolization Device

**Manuscript Number (if known):** neurintsurg-2021-018086.R1

In the interest of transparency, we ask you to disclose all relationships/activities/interests listed below that are related to the content of your manuscript. "Related" means any relation with for-profit or not-for-profit third parties whose interests may be affected by the content of the manuscript. Disclosure represents a commitment to transparency and does not necessarily indicate a bias. If you are in doubt about whether to list a relationship/activity/interest, it is preferable that you do so.

The author's relationships/activities/interests should be defined broadly. For example, if your manuscript pertains to the epidemiology of hypertension, you should declare all relationships with manufacturers of antihypertensive medication, even if that medication is not mentioned in the manuscript.

In item #1 below, report all support for the work reported in this manuscript without time limit. For all other items, the time frame for disclosure is the past 36 months.

|                                                           | Name all entities with whom you have this relationship or indicate none (add rows as needed)                                                                                   | Specifications/Comments (e.g., if payments were made to you or to your institution)                                                                                                                                                                                                                                                                                     |  |  |  |  |  |  |
|-----------------------------------------------------------|--------------------------------------------------------------------------------------------------------------------------------------------------------------------------------|-------------------------------------------------------------------------------------------------------------------------------------------------------------------------------------------------------------------------------------------------------------------------------------------------------------------------------------------------------------------------|--|--|--|--|--|--|
| <b>Time frame: Since the initial planning of the work</b> |                                                                                                                                                                                |                                                                                                                                                                                                                                                                                                                                                                         |  |  |  |  |  |  |
| <b>1</b>                                                  | All support for the present manuscript (e.g., funding, provision of study materials, medical writing, article processing charges, etc.)<br><b>No time limit for this item.</b> | <input checked="" type="checkbox"/> <b>None</b><br><table border="1" style="width: 100%; height: 40px; margin-top: 5px;"> <tr><td style="width: 60%;"></td><td style="width: 40%;"></td></tr> <tr><td></td><td></td></tr> <tr><td></td><td></td></tr> </table> <p style="font-size: small; color: gray; margin-top: 5px;">Click the tab key to add additional rows.</p> |  |  |  |  |  |  |
|                                                           |                                                                                                                                                                                |                                                                                                                                                                                                                                                                                                                                                                         |  |  |  |  |  |  |
|                                                           |                                                                                                                                                                                |                                                                                                                                                                                                                                                                                                                                                                         |  |  |  |  |  |  |
|                                                           |                                                                                                                                                                                |                                                                                                                                                                                                                                                                                                                                                                         |  |  |  |  |  |  |
| <b>Time frame: past 36 months</b>                         |                                                                                                                                                                                |                                                                                                                                                                                                                                                                                                                                                                         |  |  |  |  |  |  |
| <b>2</b>                                                  | Grants or contracts from any entity (if not indicated in item #1 above).                                                                                                       | <input checked="" type="checkbox"/> <b>None</b><br><table border="1" style="width: 100%; height: 40px; margin-top: 5px;"> <tr><td style="width: 60%;"></td><td style="width: 40%;"></td></tr> <tr><td></td><td></td></tr> <tr><td></td><td></td></tr> </table>                                                                                                          |  |  |  |  |  |  |
|                                                           |                                                                                                                                                                                |                                                                                                                                                                                                                                                                                                                                                                         |  |  |  |  |  |  |
|                                                           |                                                                                                                                                                                |                                                                                                                                                                                                                                                                                                                                                                         |  |  |  |  |  |  |
|                                                           |                                                                                                                                                                                |                                                                                                                                                                                                                                                                                                                                                                         |  |  |  |  |  |  |

|           |                                                                                                              | <b>Name all entities with whom you have this relationship or indicate none (add rows as needed)</b>                                                                                                                                                                                                               | <b>Specifications/Comments (e.g., if payments were made to you or to your institution)</b> |  |  |  |  |  |  |
|-----------|--------------------------------------------------------------------------------------------------------------|-------------------------------------------------------------------------------------------------------------------------------------------------------------------------------------------------------------------------------------------------------------------------------------------------------------------|--------------------------------------------------------------------------------------------|--|--|--|--|--|--|
| <b>3</b>  | Royalties or licenses                                                                                        | <input checked="" type="checkbox"/> <b>None</b><br><table border="1" style="width:100%; border-collapse: collapse;"> <tr><td style="width:50%; height: 20px;"></td><td style="width:50%;"></td></tr> <tr><td style="height: 20px;"></td><td></td></tr> <tr><td style="height: 20px;"></td><td></td></tr> </table> |                                                                                            |  |  |  |  |  |  |
|           |                                                                                                              |                                                                                                                                                                                                                                                                                                                   |                                                                                            |  |  |  |  |  |  |
|           |                                                                                                              |                                                                                                                                                                                                                                                                                                                   |                                                                                            |  |  |  |  |  |  |
|           |                                                                                                              |                                                                                                                                                                                                                                                                                                                   |                                                                                            |  |  |  |  |  |  |
| <b>4</b>  | Consulting fees                                                                                              | <input checked="" type="checkbox"/> <b>None</b><br><table border="1" style="width:100%; border-collapse: collapse;"> <tr><td style="width:50%; height: 20px;"></td><td style="width:50%;"></td></tr> <tr><td style="height: 20px;"></td><td></td></tr> <tr><td style="height: 20px;"></td><td></td></tr> </table> |                                                                                            |  |  |  |  |  |  |
|           |                                                                                                              |                                                                                                                                                                                                                                                                                                                   |                                                                                            |  |  |  |  |  |  |
|           |                                                                                                              |                                                                                                                                                                                                                                                                                                                   |                                                                                            |  |  |  |  |  |  |
|           |                                                                                                              |                                                                                                                                                                                                                                                                                                                   |                                                                                            |  |  |  |  |  |  |
| <b>5</b>  | Payment or honoraria for lectures, presentations, speakers bureaus, manuscript writing or educational events | <input checked="" type="checkbox"/> <b>None</b><br><table border="1" style="width:100%; border-collapse: collapse;"> <tr><td style="width:50%; height: 20px;"></td><td style="width:50%;"></td></tr> <tr><td style="height: 20px;"></td><td></td></tr> <tr><td style="height: 20px;"></td><td></td></tr> </table> |                                                                                            |  |  |  |  |  |  |
|           |                                                                                                              |                                                                                                                                                                                                                                                                                                                   |                                                                                            |  |  |  |  |  |  |
|           |                                                                                                              |                                                                                                                                                                                                                                                                                                                   |                                                                                            |  |  |  |  |  |  |
|           |                                                                                                              |                                                                                                                                                                                                                                                                                                                   |                                                                                            |  |  |  |  |  |  |
| <b>6</b>  | Payment for expert testimony                                                                                 | <input checked="" type="checkbox"/> <b>None</b><br><table border="1" style="width:100%; border-collapse: collapse;"> <tr><td style="width:50%; height: 20px;"></td><td style="width:50%;"></td></tr> <tr><td style="height: 20px;"></td><td></td></tr> <tr><td style="height: 20px;"></td><td></td></tr> </table> |                                                                                            |  |  |  |  |  |  |
|           |                                                                                                              |                                                                                                                                                                                                                                                                                                                   |                                                                                            |  |  |  |  |  |  |
|           |                                                                                                              |                                                                                                                                                                                                                                                                                                                   |                                                                                            |  |  |  |  |  |  |
|           |                                                                                                              |                                                                                                                                                                                                                                                                                                                   |                                                                                            |  |  |  |  |  |  |
| <b>7</b>  | Support for attending meetings and/or travel                                                                 | <input checked="" type="checkbox"/> <b>None</b><br><table border="1" style="width:100%; border-collapse: collapse;"> <tr><td style="width:50%; height: 20px;"></td><td style="width:50%;"></td></tr> <tr><td style="height: 20px;"></td><td></td></tr> <tr><td style="height: 20px;"></td><td></td></tr> </table> |                                                                                            |  |  |  |  |  |  |
|           |                                                                                                              |                                                                                                                                                                                                                                                                                                                   |                                                                                            |  |  |  |  |  |  |
|           |                                                                                                              |                                                                                                                                                                                                                                                                                                                   |                                                                                            |  |  |  |  |  |  |
|           |                                                                                                              |                                                                                                                                                                                                                                                                                                                   |                                                                                            |  |  |  |  |  |  |
| <b>8</b>  | Patents planned, issued or pending                                                                           | <input checked="" type="checkbox"/> <b>None</b><br><table border="1" style="width:100%; border-collapse: collapse;"> <tr><td style="width:50%; height: 20px;"></td><td style="width:50%;"></td></tr> <tr><td style="height: 20px;"></td><td></td></tr> <tr><td style="height: 20px;"></td><td></td></tr> </table> |                                                                                            |  |  |  |  |  |  |
|           |                                                                                                              |                                                                                                                                                                                                                                                                                                                   |                                                                                            |  |  |  |  |  |  |
|           |                                                                                                              |                                                                                                                                                                                                                                                                                                                   |                                                                                            |  |  |  |  |  |  |
|           |                                                                                                              |                                                                                                                                                                                                                                                                                                                   |                                                                                            |  |  |  |  |  |  |
| <b>9</b>  | Participation on a Data Safety Monitoring Board or Advisory Board                                            | <input checked="" type="checkbox"/> <b>None</b><br><table border="1" style="width:100%; border-collapse: collapse;"> <tr><td style="width:50%; height: 20px;"></td><td style="width:50%;"></td></tr> <tr><td style="height: 20px;"></td><td></td></tr> <tr><td style="height: 20px;"></td><td></td></tr> </table> |                                                                                            |  |  |  |  |  |  |
|           |                                                                                                              |                                                                                                                                                                                                                                                                                                                   |                                                                                            |  |  |  |  |  |  |
|           |                                                                                                              |                                                                                                                                                                                                                                                                                                                   |                                                                                            |  |  |  |  |  |  |
|           |                                                                                                              |                                                                                                                                                                                                                                                                                                                   |                                                                                            |  |  |  |  |  |  |
| <b>10</b> | Leadership or fiduciary role in other board, society,                                                        | <input type="checkbox"/> <b>None</b><br><table border="1" style="width:100%; border-collapse: collapse;"> <tr><td style="width:50%; height: 20px;"></td><td style="width:50%;"></td></tr> <tr><td style="height: 20px;"></td><td></td></tr> <tr><td style="height: 20px;"></td><td></td></tr> </table>            |                                                                                            |  |  |  |  |  |  |
|           |                                                                                                              |                                                                                                                                                                                                                                                                                                                   |                                                                                            |  |  |  |  |  |  |
|           |                                                                                                              |                                                                                                                                                                                                                                                                                                                   |                                                                                            |  |  |  |  |  |  |
|           |                                                                                                              |                                                                                                                                                                                                                                                                                                                   |                                                                                            |  |  |  |  |  |  |



|                                                                                                                                                                                                                                                               |                                                                                  | <b>Name all entities with whom you have this relationship or indicate none (add rows as needed)</b> | <b>Specifications/Comments (e.g., if payments were made to you or to your institution)</b> |
|---------------------------------------------------------------------------------------------------------------------------------------------------------------------------------------------------------------------------------------------------------------|----------------------------------------------------------------------------------|-----------------------------------------------------------------------------------------------------|--------------------------------------------------------------------------------------------|
|                                                                                                                                                                                                                                                               | committee or advocacy group, paid or unpaid                                      |                                                                                                     |                                                                                            |
| <b>1</b>                                                                                                                                                                                                                                                      | Stock or stock options                                                           | <input checked="" type="checkbox"/> <b>None</b>                                                     |                                                                                            |
| <b>1</b>                                                                                                                                                                                                                                                      |                                                                                  |                                                                                                     |                                                                                            |
| <b>1</b>                                                                                                                                                                                                                                                      | Receipt of equipment, materials, drugs, medical writing, gifts or other services | <input checked="" type="checkbox"/> <b>None</b>                                                     |                                                                                            |
| <b>2</b>                                                                                                                                                                                                                                                      |                                                                                  |                                                                                                     |                                                                                            |
| <b>1</b>                                                                                                                                                                                                                                                      | Other financial or non-financial interests                                       | <input checked="" type="checkbox"/> <b>None</b>                                                     |                                                                                            |
| <b>3</b>                                                                                                                                                                                                                                                      |                                                                                  |                                                                                                     |                                                                                            |
| <p><b>Please place an "X" next to the following statement to indicate your agreement:</b></p> <p><input checked="" type="checkbox"/> I certify that I have answered every question and have not altered the wording of any of the questions on this form.</p> |                                                                                  |                                                                                                     |                                                                                            |

## ICMJE DISCLOSURE FORM

**Date:** 12/01/2021

**Your Name:** Ahrya Derakhshani

**Manuscript Title:** Vessel-Wall Imaging with Advanced Flow Suppression in the Characterization of Intracranial Aneurysms Following Flow Diversion with Pipeline Embolization Device

**Manuscript Number (if known):** neurintsurg-2021-018086.R1

In the interest of transparency, we ask you to disclose all relationships/activities/interests listed below that are related to the content of your manuscript. "Related" means any relation with for-profit or not-for-profit third parties whose interests may be affected by the content of the manuscript. Disclosure represents a commitment to transparency and does not necessarily indicate a bias. If you are in doubt about whether to list a relationship/activity/interest, it is preferable that you do so.

The author's relationships/activities/interests should be defined broadly. For example, if your manuscript pertains to the epidemiology of hypertension, you should declare all relationships with manufacturers of antihypertensive medication, even if that medication is not mentioned in the manuscript.

In item #1 below, report all support for the work reported in this manuscript without time limit. For all other items, the time frame for disclosure is the past 36 months.

|                                                           | Name all entities with whom you have this relationship or indicate none (add rows as needed)                                                                                   | Specifications/Comments (e.g., if payments were made to you or to your institution)                                                                                                                                                                                                                                                                                     |  |  |  |  |  |  |
|-----------------------------------------------------------|--------------------------------------------------------------------------------------------------------------------------------------------------------------------------------|-------------------------------------------------------------------------------------------------------------------------------------------------------------------------------------------------------------------------------------------------------------------------------------------------------------------------------------------------------------------------|--|--|--|--|--|--|
| <b>Time frame: Since the initial planning of the work</b> |                                                                                                                                                                                |                                                                                                                                                                                                                                                                                                                                                                         |  |  |  |  |  |  |
| <b>1</b>                                                  | All support for the present manuscript (e.g., funding, provision of study materials, medical writing, article processing charges, etc.)<br><b>No time limit for this item.</b> | <input checked="" type="checkbox"/> <b>None</b><br><table border="1" style="width: 100%; height: 40px; margin-top: 5px;"> <tr><td style="width: 60%;"></td><td style="width: 40%;"></td></tr> <tr><td></td><td></td></tr> <tr><td></td><td></td></tr> </table> <p style="font-size: small; color: gray; margin-top: 5px;">Click the tab key to add additional rows.</p> |  |  |  |  |  |  |
|                                                           |                                                                                                                                                                                |                                                                                                                                                                                                                                                                                                                                                                         |  |  |  |  |  |  |
|                                                           |                                                                                                                                                                                |                                                                                                                                                                                                                                                                                                                                                                         |  |  |  |  |  |  |
|                                                           |                                                                                                                                                                                |                                                                                                                                                                                                                                                                                                                                                                         |  |  |  |  |  |  |
| <b>Time frame: past 36 months</b>                         |                                                                                                                                                                                |                                                                                                                                                                                                                                                                                                                                                                         |  |  |  |  |  |  |
| <b>2</b>                                                  | Grants or contracts from any entity (if not indicated in item #1 above).                                                                                                       | <input checked="" type="checkbox"/> <b>None</b><br><table border="1" style="width: 100%; height: 40px; margin-top: 5px;"> <tr><td style="width: 60%;"></td><td style="width: 40%;"></td></tr> <tr><td></td><td></td></tr> <tr><td></td><td></td></tr> </table>                                                                                                          |  |  |  |  |  |  |
|                                                           |                                                                                                                                                                                |                                                                                                                                                                                                                                                                                                                                                                         |  |  |  |  |  |  |
|                                                           |                                                                                                                                                                                |                                                                                                                                                                                                                                                                                                                                                                         |  |  |  |  |  |  |
|                                                           |                                                                                                                                                                                |                                                                                                                                                                                                                                                                                                                                                                         |  |  |  |  |  |  |

|           |                                                                                                              | <b>Name all entities with whom you have this relationship or indicate none (add rows as needed)</b>                                                                                                                                                                                                               | <b>Specifications/Comments (e.g., if payments were made to you or to your institution)</b> |  |  |  |  |  |  |
|-----------|--------------------------------------------------------------------------------------------------------------|-------------------------------------------------------------------------------------------------------------------------------------------------------------------------------------------------------------------------------------------------------------------------------------------------------------------|--------------------------------------------------------------------------------------------|--|--|--|--|--|--|
| <b>3</b>  | Royalties or licenses                                                                                        | <input checked="" type="checkbox"/> <b>None</b><br><table border="1" style="width:100%; border-collapse: collapse;"> <tr><td style="width:50%; height: 20px;"></td><td style="width:50%;"></td></tr> <tr><td style="height: 20px;"></td><td></td></tr> <tr><td style="height: 20px;"></td><td></td></tr> </table> |                                                                                            |  |  |  |  |  |  |
|           |                                                                                                              |                                                                                                                                                                                                                                                                                                                   |                                                                                            |  |  |  |  |  |  |
|           |                                                                                                              |                                                                                                                                                                                                                                                                                                                   |                                                                                            |  |  |  |  |  |  |
|           |                                                                                                              |                                                                                                                                                                                                                                                                                                                   |                                                                                            |  |  |  |  |  |  |
| <b>4</b>  | Consulting fees                                                                                              | <input checked="" type="checkbox"/> <b>None</b><br><table border="1" style="width:100%; border-collapse: collapse;"> <tr><td style="width:50%; height: 20px;"></td><td style="width:50%;"></td></tr> <tr><td style="height: 20px;"></td><td></td></tr> <tr><td style="height: 20px;"></td><td></td></tr> </table> |                                                                                            |  |  |  |  |  |  |
|           |                                                                                                              |                                                                                                                                                                                                                                                                                                                   |                                                                                            |  |  |  |  |  |  |
|           |                                                                                                              |                                                                                                                                                                                                                                                                                                                   |                                                                                            |  |  |  |  |  |  |
|           |                                                                                                              |                                                                                                                                                                                                                                                                                                                   |                                                                                            |  |  |  |  |  |  |
| <b>5</b>  | Payment or honoraria for lectures, presentations, speakers bureaus, manuscript writing or educational events | <input checked="" type="checkbox"/> <b>None</b><br><table border="1" style="width:100%; border-collapse: collapse;"> <tr><td style="width:50%; height: 20px;"></td><td style="width:50%;"></td></tr> <tr><td style="height: 20px;"></td><td></td></tr> <tr><td style="height: 20px;"></td><td></td></tr> </table> |                                                                                            |  |  |  |  |  |  |
|           |                                                                                                              |                                                                                                                                                                                                                                                                                                                   |                                                                                            |  |  |  |  |  |  |
|           |                                                                                                              |                                                                                                                                                                                                                                                                                                                   |                                                                                            |  |  |  |  |  |  |
|           |                                                                                                              |                                                                                                                                                                                                                                                                                                                   |                                                                                            |  |  |  |  |  |  |
| <b>6</b>  | Payment for expert testimony                                                                                 | <input checked="" type="checkbox"/> <b>None</b><br><table border="1" style="width:100%; border-collapse: collapse;"> <tr><td style="width:50%; height: 20px;"></td><td style="width:50%;"></td></tr> <tr><td style="height: 20px;"></td><td></td></tr> <tr><td style="height: 20px;"></td><td></td></tr> </table> |                                                                                            |  |  |  |  |  |  |
|           |                                                                                                              |                                                                                                                                                                                                                                                                                                                   |                                                                                            |  |  |  |  |  |  |
|           |                                                                                                              |                                                                                                                                                                                                                                                                                                                   |                                                                                            |  |  |  |  |  |  |
|           |                                                                                                              |                                                                                                                                                                                                                                                                                                                   |                                                                                            |  |  |  |  |  |  |
| <b>7</b>  | Support for attending meetings and/or travel                                                                 | <input checked="" type="checkbox"/> <b>None</b><br><table border="1" style="width:100%; border-collapse: collapse;"> <tr><td style="width:50%; height: 20px;"></td><td style="width:50%;"></td></tr> <tr><td style="height: 20px;"></td><td></td></tr> <tr><td style="height: 20px;"></td><td></td></tr> </table> |                                                                                            |  |  |  |  |  |  |
|           |                                                                                                              |                                                                                                                                                                                                                                                                                                                   |                                                                                            |  |  |  |  |  |  |
|           |                                                                                                              |                                                                                                                                                                                                                                                                                                                   |                                                                                            |  |  |  |  |  |  |
|           |                                                                                                              |                                                                                                                                                                                                                                                                                                                   |                                                                                            |  |  |  |  |  |  |
| <b>8</b>  | Patents planned, issued or pending                                                                           | <input checked="" type="checkbox"/> <b>None</b><br><table border="1" style="width:100%; border-collapse: collapse;"> <tr><td style="width:50%; height: 20px;"></td><td style="width:50%;"></td></tr> <tr><td style="height: 20px;"></td><td></td></tr> <tr><td style="height: 20px;"></td><td></td></tr> </table> |                                                                                            |  |  |  |  |  |  |
|           |                                                                                                              |                                                                                                                                                                                                                                                                                                                   |                                                                                            |  |  |  |  |  |  |
|           |                                                                                                              |                                                                                                                                                                                                                                                                                                                   |                                                                                            |  |  |  |  |  |  |
|           |                                                                                                              |                                                                                                                                                                                                                                                                                                                   |                                                                                            |  |  |  |  |  |  |
| <b>9</b>  | Participation on a Data Safety Monitoring Board or Advisory Board                                            | <input checked="" type="checkbox"/> <b>None</b><br><table border="1" style="width:100%; border-collapse: collapse;"> <tr><td style="width:50%; height: 20px;"></td><td style="width:50%;"></td></tr> <tr><td style="height: 20px;"></td><td></td></tr> <tr><td style="height: 20px;"></td><td></td></tr> </table> |                                                                                            |  |  |  |  |  |  |
|           |                                                                                                              |                                                                                                                                                                                                                                                                                                                   |                                                                                            |  |  |  |  |  |  |
|           |                                                                                                              |                                                                                                                                                                                                                                                                                                                   |                                                                                            |  |  |  |  |  |  |
|           |                                                                                                              |                                                                                                                                                                                                                                                                                                                   |                                                                                            |  |  |  |  |  |  |
| <b>10</b> | Leadership or fiduciary role in other board, society,                                                        | <input checked="" type="checkbox"/> <b>None</b><br><table border="1" style="width:100%; border-collapse: collapse;"> <tr><td style="width:50%; height: 20px;"></td><td style="width:50%;"></td></tr> <tr><td style="height: 20px;"></td><td></td></tr> <tr><td style="height: 20px;"></td><td></td></tr> </table> |                                                                                            |  |  |  |  |  |  |
|           |                                                                                                              |                                                                                                                                                                                                                                                                                                                   |                                                                                            |  |  |  |  |  |  |
|           |                                                                                                              |                                                                                                                                                                                                                                                                                                                   |                                                                                            |  |  |  |  |  |  |
|           |                                                                                                              |                                                                                                                                                                                                                                                                                                                   |                                                                                            |  |  |  |  |  |  |

|                                                                                                                                                                                                                                                               |                                                                                  | <b>Name all entities with whom you have this relationship or indicate none (add rows as needed)</b> | <b>Specifications/Comments (e.g., if payments were made to you or to your institution)</b> |
|---------------------------------------------------------------------------------------------------------------------------------------------------------------------------------------------------------------------------------------------------------------|----------------------------------------------------------------------------------|-----------------------------------------------------------------------------------------------------|--------------------------------------------------------------------------------------------|
|                                                                                                                                                                                                                                                               | committee or advocacy group, paid or unpaid                                      |                                                                                                     |                                                                                            |
| <b>1</b>                                                                                                                                                                                                                                                      | Stock or stock options                                                           | <input checked="" type="checkbox"/> <b>None</b>                                                     |                                                                                            |
| <b>1</b>                                                                                                                                                                                                                                                      |                                                                                  |                                                                                                     |                                                                                            |
| <b>1</b>                                                                                                                                                                                                                                                      | Receipt of equipment, materials, drugs, medical writing, gifts or other services | <input checked="" type="checkbox"/> <b>None</b>                                                     |                                                                                            |
| <b>2</b>                                                                                                                                                                                                                                                      |                                                                                  |                                                                                                     |                                                                                            |
| <b>1</b>                                                                                                                                                                                                                                                      | Other financial or non-financial interests                                       | <input checked="" type="checkbox"/> <b>None</b>                                                     |                                                                                            |
| <b>3</b>                                                                                                                                                                                                                                                      |                                                                                  |                                                                                                     |                                                                                            |
| <p><b>Please place an "X" next to the following statement to indicate your agreement:</b></p> <p><input checked="" type="checkbox"/> I certify that I have answered every question and have not altered the wording of any of the questions on this form.</p> |                                                                                  |                                                                                                     |                                                                                            |

## ICMJE DISCLOSURE FORM

**Date:** 12/01/2021

**Your Name:** John Grinstead

**Manuscript Title:** Vessel-Wall Imaging with Advanced Flow Suppression in the Characterization of Intracranial Aneurysms Following Flow Diversion with Pipeline Embolization Device

**Manuscript Number (if known):** Manuscript ID neurintsurg-2021-018086.R1

In the interest of transparency, we ask you to disclose all relationships/activities/interests listed below that are related to the content of your manuscript. "Related" means any relation with for-profit or not-for-profit third parties whose interests may be affected by the content of the manuscript. Disclosure represents a commitment to transparency and does not necessarily indicate a bias. If you are in doubt about whether to list a relationship/activity/interest, it is preferable that you do so.

The author's relationships/activities/interests should be defined broadly. For example, if your manuscript pertains to the epidemiology of hypertension, you should declare all relationships with manufacturers of antihypertensive medication, even if that medication is not mentioned in the manuscript.

In item #1 below, report all support for the work reported in this manuscript without time limit. For all other items, the time frame for disclosure is the past 36 months.

|                                                           | Name all entities with whom you have this relationship or indicate none (add rows as needed)                                                                                   | Specifications/Comments (e.g., if payments were made to you or to your institution)                                                                                                                                                                                                                                                                                     |  |  |  |  |  |  |
|-----------------------------------------------------------|--------------------------------------------------------------------------------------------------------------------------------------------------------------------------------|-------------------------------------------------------------------------------------------------------------------------------------------------------------------------------------------------------------------------------------------------------------------------------------------------------------------------------------------------------------------------|--|--|--|--|--|--|
| <b>Time frame: Since the initial planning of the work</b> |                                                                                                                                                                                |                                                                                                                                                                                                                                                                                                                                                                         |  |  |  |  |  |  |
| <b>1</b>                                                  | All support for the present manuscript (e.g., funding, provision of study materials, medical writing, article processing charges, etc.)<br><b>No time limit for this item.</b> | <input checked="" type="checkbox"/> <b>None</b><br><table border="1" style="width: 100%; height: 40px; margin-top: 5px;"> <tr><td style="width: 60%;"></td><td style="width: 40%;"></td></tr> <tr><td></td><td></td></tr> <tr><td></td><td></td></tr> </table> <p style="font-size: small; color: gray; margin-top: 5px;">Click the tab key to add additional rows.</p> |  |  |  |  |  |  |
|                                                           |                                                                                                                                                                                |                                                                                                                                                                                                                                                                                                                                                                         |  |  |  |  |  |  |
|                                                           |                                                                                                                                                                                |                                                                                                                                                                                                                                                                                                                                                                         |  |  |  |  |  |  |
|                                                           |                                                                                                                                                                                |                                                                                                                                                                                                                                                                                                                                                                         |  |  |  |  |  |  |
| <b>Time frame: past 36 months</b>                         |                                                                                                                                                                                |                                                                                                                                                                                                                                                                                                                                                                         |  |  |  |  |  |  |
| <b>2</b>                                                  | Grants or contracts from any entity (if not indicated in item #1 above).                                                                                                       | <input checked="" type="checkbox"/> <b>None</b><br><table border="1" style="width: 100%; height: 40px; margin-top: 5px;"> <tr><td style="width: 60%;"></td><td style="width: 40%;"></td></tr> <tr><td></td><td></td></tr> <tr><td></td><td></td></tr> </table>                                                                                                          |  |  |  |  |  |  |
|                                                           |                                                                                                                                                                                |                                                                                                                                                                                                                                                                                                                                                                         |  |  |  |  |  |  |
|                                                           |                                                                                                                                                                                |                                                                                                                                                                                                                                                                                                                                                                         |  |  |  |  |  |  |
|                                                           |                                                                                                                                                                                |                                                                                                                                                                                                                                                                                                                                                                         |  |  |  |  |  |  |

|           |                                                                                                              | <b>Name all entities with whom you have this relationship or indicate none (add rows as needed)</b>                                                                                                                                                                                                               | <b>Specifications/Comments (e.g., if payments were made to you or to your institution)</b> |  |  |  |  |  |  |
|-----------|--------------------------------------------------------------------------------------------------------------|-------------------------------------------------------------------------------------------------------------------------------------------------------------------------------------------------------------------------------------------------------------------------------------------------------------------|--------------------------------------------------------------------------------------------|--|--|--|--|--|--|
| <b>3</b>  | Royalties or licenses                                                                                        | <input checked="" type="checkbox"/> <b>None</b><br><table border="1" style="width:100%; border-collapse: collapse;"> <tr><td style="width:50%; height: 20px;"></td><td style="width:50%;"></td></tr> <tr><td style="height: 20px;"></td><td></td></tr> <tr><td style="height: 20px;"></td><td></td></tr> </table> |                                                                                            |  |  |  |  |  |  |
|           |                                                                                                              |                                                                                                                                                                                                                                                                                                                   |                                                                                            |  |  |  |  |  |  |
|           |                                                                                                              |                                                                                                                                                                                                                                                                                                                   |                                                                                            |  |  |  |  |  |  |
|           |                                                                                                              |                                                                                                                                                                                                                                                                                                                   |                                                                                            |  |  |  |  |  |  |
| <b>4</b>  | Consulting fees                                                                                              | <input checked="" type="checkbox"/> <b>None</b><br><table border="1" style="width:100%; border-collapse: collapse;"> <tr><td style="width:50%; height: 20px;"></td><td style="width:50%;"></td></tr> <tr><td style="height: 20px;"></td><td></td></tr> <tr><td style="height: 20px;"></td><td></td></tr> </table> |                                                                                            |  |  |  |  |  |  |
|           |                                                                                                              |                                                                                                                                                                                                                                                                                                                   |                                                                                            |  |  |  |  |  |  |
|           |                                                                                                              |                                                                                                                                                                                                                                                                                                                   |                                                                                            |  |  |  |  |  |  |
|           |                                                                                                              |                                                                                                                                                                                                                                                                                                                   |                                                                                            |  |  |  |  |  |  |
| <b>5</b>  | Payment or honoraria for lectures, presentations, speakers bureaus, manuscript writing or educational events | <input checked="" type="checkbox"/> <b>None</b><br><table border="1" style="width:100%; border-collapse: collapse;"> <tr><td style="width:50%; height: 20px;"></td><td style="width:50%;"></td></tr> <tr><td style="height: 20px;"></td><td></td></tr> <tr><td style="height: 20px;"></td><td></td></tr> </table> |                                                                                            |  |  |  |  |  |  |
|           |                                                                                                              |                                                                                                                                                                                                                                                                                                                   |                                                                                            |  |  |  |  |  |  |
|           |                                                                                                              |                                                                                                                                                                                                                                                                                                                   |                                                                                            |  |  |  |  |  |  |
|           |                                                                                                              |                                                                                                                                                                                                                                                                                                                   |                                                                                            |  |  |  |  |  |  |
| <b>6</b>  | Payment for expert testimony                                                                                 | <input checked="" type="checkbox"/> <b>None</b><br><table border="1" style="width:100%; border-collapse: collapse;"> <tr><td style="width:50%; height: 20px;"></td><td style="width:50%;"></td></tr> <tr><td style="height: 20px;"></td><td></td></tr> <tr><td style="height: 20px;"></td><td></td></tr> </table> |                                                                                            |  |  |  |  |  |  |
|           |                                                                                                              |                                                                                                                                                                                                                                                                                                                   |                                                                                            |  |  |  |  |  |  |
|           |                                                                                                              |                                                                                                                                                                                                                                                                                                                   |                                                                                            |  |  |  |  |  |  |
|           |                                                                                                              |                                                                                                                                                                                                                                                                                                                   |                                                                                            |  |  |  |  |  |  |
| <b>7</b>  | Support for attending meetings and/or travel                                                                 | <input checked="" type="checkbox"/> <b>None</b><br><table border="1" style="width:100%; border-collapse: collapse;"> <tr><td style="width:50%; height: 20px;"></td><td style="width:50%;"></td></tr> <tr><td style="height: 20px;"></td><td></td></tr> <tr><td style="height: 20px;"></td><td></td></tr> </table> |                                                                                            |  |  |  |  |  |  |
|           |                                                                                                              |                                                                                                                                                                                                                                                                                                                   |                                                                                            |  |  |  |  |  |  |
|           |                                                                                                              |                                                                                                                                                                                                                                                                                                                   |                                                                                            |  |  |  |  |  |  |
|           |                                                                                                              |                                                                                                                                                                                                                                                                                                                   |                                                                                            |  |  |  |  |  |  |
| <b>8</b>  | Patents planned, issued or pending                                                                           | <input checked="" type="checkbox"/> <b>None</b><br><table border="1" style="width:100%; border-collapse: collapse;"> <tr><td style="width:50%; height: 20px;"></td><td style="width:50%;"></td></tr> <tr><td style="height: 20px;"></td><td></td></tr> <tr><td style="height: 20px;"></td><td></td></tr> </table> |                                                                                            |  |  |  |  |  |  |
|           |                                                                                                              |                                                                                                                                                                                                                                                                                                                   |                                                                                            |  |  |  |  |  |  |
|           |                                                                                                              |                                                                                                                                                                                                                                                                                                                   |                                                                                            |  |  |  |  |  |  |
|           |                                                                                                              |                                                                                                                                                                                                                                                                                                                   |                                                                                            |  |  |  |  |  |  |
| <b>9</b>  | Participation on a Data Safety Monitoring Board or Advisory Board                                            | <input checked="" type="checkbox"/> <b>None</b><br><table border="1" style="width:100%; border-collapse: collapse;"> <tr><td style="width:50%; height: 20px;"></td><td style="width:50%;"></td></tr> <tr><td style="height: 20px;"></td><td></td></tr> <tr><td style="height: 20px;"></td><td></td></tr> </table> |                                                                                            |  |  |  |  |  |  |
|           |                                                                                                              |                                                                                                                                                                                                                                                                                                                   |                                                                                            |  |  |  |  |  |  |
|           |                                                                                                              |                                                                                                                                                                                                                                                                                                                   |                                                                                            |  |  |  |  |  |  |
|           |                                                                                                              |                                                                                                                                                                                                                                                                                                                   |                                                                                            |  |  |  |  |  |  |
| <b>10</b> | Leadership or fiduciary role in other board, society,                                                        | <input checked="" type="checkbox"/> <b>None</b><br><table border="1" style="width:100%; border-collapse: collapse;"> <tr><td style="width:50%; height: 20px;"></td><td style="width:50%;"></td></tr> <tr><td style="height: 20px;"></td><td></td></tr> <tr><td style="height: 20px;"></td><td></td></tr> </table> |                                                                                            |  |  |  |  |  |  |
|           |                                                                                                              |                                                                                                                                                                                                                                                                                                                   |                                                                                            |  |  |  |  |  |  |
|           |                                                                                                              |                                                                                                                                                                                                                                                                                                                   |                                                                                            |  |  |  |  |  |  |
|           |                                                                                                              |                                                                                                                                                                                                                                                                                                                   |                                                                                            |  |  |  |  |  |  |

|                                                                                                                                                                                                                                                               |                                                                                  | <b>Name all entities with whom you have this relationship or indicate none (add rows as needed)</b> | <b>Specifications/Comments (e.g., if payments were made to you or to your institution)</b> |
|---------------------------------------------------------------------------------------------------------------------------------------------------------------------------------------------------------------------------------------------------------------|----------------------------------------------------------------------------------|-----------------------------------------------------------------------------------------------------|--------------------------------------------------------------------------------------------|
|                                                                                                                                                                                                                                                               | committee or advocacy group, paid or unpaid                                      |                                                                                                     |                                                                                            |
| <b>1</b>                                                                                                                                                                                                                                                      | Stock or stock options                                                           | <input checked="" type="checkbox"/> <b>None</b>                                                     |                                                                                            |
| <b>1</b>                                                                                                                                                                                                                                                      |                                                                                  |                                                                                                     |                                                                                            |
| <b>1</b>                                                                                                                                                                                                                                                      | Receipt of equipment, materials, drugs, medical writing, gifts or other services | <input checked="" type="checkbox"/> <b>None</b>                                                     |                                                                                            |
| <b>2</b>                                                                                                                                                                                                                                                      |                                                                                  |                                                                                                     |                                                                                            |
| <b>1</b>                                                                                                                                                                                                                                                      | Other financial or non-financial interests                                       | <input type="checkbox"/> <b>None</b>                                                                |                                                                                            |
| <b>3</b>                                                                                                                                                                                                                                                      |                                                                                  | John Grinstead is a full time employee of Siemens Medical Solutions USA, Inc.                       |                                                                                            |
|                                                                                                                                                                                                                                                               |                                                                                  |                                                                                                     |                                                                                            |
| <p><b>Please place an "X" next to the following statement to indicate your agreement:</b></p> <p><input checked="" type="checkbox"/> I certify that I have answered every question and have not altered the wording of any of the questions on this form.</p> |                                                                                  |                                                                                                     |                                                                                            |

**ICMJE DISCLOSURE FORM**

**Date:** 11/30/2021

**Your Name:** Seena Dehkharghani

**Manuscript Title:** Vessel-Wall Imaging with Advanced Flow Suppression in the Characterization of Intracranial Aneurysms Following Flow Diversion with Pipeline Embolization Device

**Manuscript Number (if known):** neurintsurg-2021-018086.R1

In the interest of transparency, we ask you to disclose all relationships/activities/interests listed below that are related to the content of your manuscript. "Related" means any relation with for-profit or not-for-profit third parties whose interests may be affected by the content of the manuscript. Disclosure represents a commitment to transparency and does not necessarily indicate a bias. If you are in doubt about whether to list a relationship/activity/interest, it is preferable that you do so.

The author's relationships/activities/interests should be defined broadly. For example, if your manuscript pertains to the epidemiology of hypertension, you should declare all relationships with manufacturers of antihypertensive medication, even if that medication is not mentioned in the manuscript.

In item #1 below, report all support for the work reported in this manuscript without time limit. For all other items, the time frame for disclosure is the past 36 months.

|                                                           |                                                                                                                                                                                | <b>Name all entities with whom you have this relationship or indicate none (add rows as needed)</b>               | <b>Specifications/Comments (e.g., if payments were made to you or to your institution)</b> |
|-----------------------------------------------------------|--------------------------------------------------------------------------------------------------------------------------------------------------------------------------------|-------------------------------------------------------------------------------------------------------------------|--------------------------------------------------------------------------------------------|
| <b>Time frame: Since the initial planning of the work</b> |                                                                                                                                                                                |                                                                                                                   |                                                                                            |
| <b>1</b>                                                  | All support for the present manuscript (e.g., funding, provision of study materials, medical writing, article processing charges, etc.)<br><b>No time limit for this item.</b> | <input checked="" type="checkbox"/> <b>None</b>                                                                   |                                                                                            |
|                                                           |                                                                                                                                                                                |                                                                                                                   |                                                                                            |
|                                                           |                                                                                                                                                                                |                                                                                                                   |                                                                                            |
|                                                           |                                                                                                                                                                                | <small>Click the tab key to add additional rows.</small>                                                          |                                                                                            |
| <b>Time frame: past 36 months</b>                         |                                                                                                                                                                                |                                                                                                                   |                                                                                            |
| <b>2</b>                                                  | Grants or contracts from any entity (if not indicated in item #1 above).                                                                                                       | <input type="checkbox"/> <b>None</b>                                                                              |                                                                                            |
|                                                           |                                                                                                                                                                                | Grant funding from undisclosed source for development of mobile stroke detection technology (paid to institution) |                                                                                            |
|                                                           |                                                                                                                                                                                |                                                                                                                   |                                                                                            |
|                                                           |                                                                                                                                                                                |                                                                                                                   |                                                                                            |



|           |                                                                                                              | <b>Name all entities with whom you have this relationship or indicate none (add rows as needed)</b>                                           | <b>Specifications/Comments (e.g., if payments were made to you or to your institution)</b> |
|-----------|--------------------------------------------------------------------------------------------------------------|-----------------------------------------------------------------------------------------------------------------------------------------------|--------------------------------------------------------------------------------------------|
| <b>3</b>  | Royalties or licenses                                                                                        | <input checked="" type="checkbox"/> <b>None</b><br><br><br>                                                                                   |                                                                                            |
| <b>4</b>  | Consulting fees                                                                                              | <input type="checkbox"/> <b>None</b><br>Regeneron<br><br>                                                                                     |                                                                                            |
| <b>5</b>  | Payment or honoraria for lectures, presentations, speakers bureaus, manuscript writing or educational events | <input checked="" type="checkbox"/> <b>None</b><br><br><br>                                                                                   |                                                                                            |
| <b>6</b>  | Payment for expert testimony                                                                                 | <input checked="" type="checkbox"/> <b>None</b><br><br><br>                                                                                   |                                                                                            |
| <b>7</b>  | Support for attending meetings and/or travel                                                                 | <input checked="" type="checkbox"/> <b>None</b><br><br><br>                                                                                   |                                                                                            |
| <b>8</b>  | Patents planned, issued or pending                                                                           | <input type="checkbox"/> <b>None</b><br>Patent pending for mobile stroke detection instrumentation using tissue electrical properties<br><br> |                                                                                            |
| <b>9</b>  | Participation on a Data Safety Monitoring Board or Advisory Board                                            | <input checked="" type="checkbox"/> <b>None</b><br><br><br>                                                                                   |                                                                                            |
| <b>10</b> | Leadership or fiduciary role in other                                                                        | <input checked="" type="checkbox"/> <b>None</b><br><br>                                                                                       |                                                                                            |

|                                                                                                                                                                                                                                                               |                                                                                  | <b>Name all entities with whom you have this relationship or indicate none (add rows as needed)</b> | <b>Specifications/Comments (e.g., if payments were made to you or to your institution)</b> |
|---------------------------------------------------------------------------------------------------------------------------------------------------------------------------------------------------------------------------------------------------------------|----------------------------------------------------------------------------------|-----------------------------------------------------------------------------------------------------|--------------------------------------------------------------------------------------------|
|                                                                                                                                                                                                                                                               | board, society, committee or advocacy group, paid or unpaid                      |                                                                                                     |                                                                                            |
| <b>1</b>                                                                                                                                                                                                                                                      | Stock or stock options                                                           | <input checked="" type="checkbox"/> <b>None</b>                                                     |                                                                                            |
| <b>1</b>                                                                                                                                                                                                                                                      |                                                                                  |                                                                                                     |                                                                                            |
| <b>1</b>                                                                                                                                                                                                                                                      | Receipt of equipment, materials, drugs, medical writing, gifts or other services | <input type="checkbox"/> <b>None</b>                                                                |                                                                                            |
| <b>2</b>                                                                                                                                                                                                                                                      |                                                                                  | Unpaid scientific collaborations with RAPID.AI                                                      |                                                                                            |
|                                                                                                                                                                                                                                                               |                                                                                  |                                                                                                     |                                                                                            |
| <b>1</b>                                                                                                                                                                                                                                                      | Other financial or non-financial interests                                       | <input checked="" type="checkbox"/> <b>None</b>                                                     |                                                                                            |
| <b>3</b>                                                                                                                                                                                                                                                      |                                                                                  |                                                                                                     |                                                                                            |
|                                                                                                                                                                                                                                                               |                                                                                  |                                                                                                     |                                                                                            |
| <p><b>Please place an "X" next to the following statement to indicate your agreement:</b></p> <p><input checked="" type="checkbox"/> I certify that I have answered every question and have not altered the wording of any of the questions on this form.</p> |                                                                                  |                                                                                                     |                                                                                            |
